# Supplementary material for: Whole-genome SNP analysis elucidates the genetic structure of Russian cattle and its relationship with Eurasian taurine breeds
Source: PubMed Central journal article supplement (PMC6042431; doi:10.1186/s12711-018-0408-8), 2018-07-11
Supplement: 12711_2018_408_MOESM1_ESM.pdf [file 12711_2018_408_MOESM1_ESM.pdf]

## Supplementary Materials

Table S1: Short description of the local Russian breeds under study.

| Breed           | Abbreviation | Status            | The issue of the first herd book, year | Population size by year, in thousands heads |        |        | Productivity type        | The region of origin, the breeds involved in breed development                                                                                                           |
|-----------------|--------------|-------------------|----------------------------------------|---------------------------------------------|--------|--------|--------------------------|--------------------------------------------------------------------------------------------------------------------------------------------------------------------------|
|                 |              |                   |                                        | 1960                                        | 1991   | 2015   |                          |                                                                                                                                                                          |
| Bestuzhev       | BEST         | locally developed | 1928                                   | 902.0                                       | 618.9  | 24.3   | dairy                    | Central Russia, Ulyanovsk region; improvement of local cattle, which inhabited the banks of Volga river by Shorthorn, Dutch Holstein, Wilstermarsch and Simmental cattle |
| Black-and-White | BLWT         | locally developed | 1925                                   | 2167.0                                      | 8867.2 | 1649.6 | dairy                    | Central part of Russia, the Volga region, improvement of local cattle by Dutch cattle and then by Holsteins                                                              |
| Kalmyk          | KALM         | native            | 1934                                   | 282.0                                       | 310.0  | 138.3  | beef                     | South of Russia, Republic of Kalmykia; originates from cattle of nomadic people of the south steppe                                                                      |
| Kholmogor       | KHLM         | native            | 1927                                   | 993.0                                       | 1388.5 | 222.9  | dairy                    | North of the Europe part of Russia, Arkhangelsk region, islands in the upper reaches of the of the Northern Dvina river                                                  |
| Kostromsky      | KSTR         | locally developed | 1944                                   | 276.0                                       | 158.0  | 10.9   | dual purpose (milk/beef) | Central Russia, Kostroma region, crossbreeding local cattle with Brown Swiss cattle                                                                                      |
| Red Gorbатов    | RGBT         | native            | 1926                                   | 282.0                                       | 17.9   | 1.7    | dairy                    | Central Russia, Nizhny Novgorod region; improvement by Tirol cattle (Tux-Zillertal)                                                                                      |
| Suksun          | SKSN         | locally developed | 1943                                   | 23.3                                        | 13.7   | 2.3    | dairy                    | Central Russia, Perm region; improvement of local cattle by Danish Red (Angeln cattle) and then by Red Holsteins                                                         |
| Yakut           | YAKT         | native            | 1929                                   | 2.3                                         | 0.9    | 0.6    | primitive                | Sakha (Yakutia) Republic; folk selection                                                                                                                                 |
| Yaroslavl       | YRSL         | native            | 1925                                   | 951.0                                       | 413.3  | 50.5   | dairy                    | Central Russia, Yaroslavl region                                                                                                                                         |
