# Supplementary material for: Whole-genome SNP analysis elucidates the genetic structure of Russian cattle and its relationship with Eurasian taurine breeds
Source: PubMed Central journal article supplement (PMC6042431; doi:10.1186/s12711-018-0408-8), 2018-07-11
Supplement: 12711_2018_408_MOESM5_ESM.pdf [file 12711_2018_408_MOESM5_ESM.pdf]

## Supplementary Materials

Additional file 5. Table S3: Pair-wise Wright fixation index ( $F_{ST}$ )

|       | BEST   | BLWT   | KALM   | KHLM   | KSTR   | RGBT   | SKSN   | YAKT   | YRSL   |
|-------|--------|--------|--------|--------|--------|--------|--------|--------|--------|
| BEST  |        |        |        |        |        |        |        |        |        |
| BLWT  | 0.0444 |        |        |        |        |        |        |        |        |
| KALM  | 0.0512 | 0.0638 |        |        |        |        |        |        |        |
| KHLM  | 0.0693 | 0.0699 | 0.0790 |        |        |        |        |        |        |
| KSTR  | 0.0738 | 0.0850 | 0.0722 | 0.1010 |        |        |        |        |        |
| RGBT  | 0.0744 | 0.0779 | 0.0810 | 0.0986 | 0.1029 |        |        |        |        |
| SKSN  | 0.0441 | 0.0360 | 0.0619 | 0.0708 | 0.0797 | 0.0594 |        |        |        |
| YAKT  | 0.1611 | 0.1771 | 0.1293 | 0.1858 | 0.1815 | 0.1901 | 0.1749 |        |        |
| YRSL  | 0.0680 | 0.0770 | 0.0701 | 0.0880 | 0.0946 | 0.0988 | 0.0743 | 0.1776 |        |
| KAZAK | 0.0632 | 0.0702 | 0.0622 | 0.0910 | 0.0872 | 0.0929 | 0.0679 | 0.1842 | 0.0895 |
| AULIA | 0.0275 | 0.0243 | 0.0267 | 0.0548 | 0.0554 | 0.0596 | 0.0310 | 0.1479 | 0.0545 |
| ALATA | 0.0579 | 0.0670 | 0.0547 | 0.0898 | 0.0444 | 0.0909 | 0.0650 | 0.1809 | 0.0825 |
| WHUKR | 0.0490 | 0.0524 | 0.0476 | 0.0737 | 0.0706 | 0.0798 | 0.0543 | 0.1648 | 0.0714 |
| GRUKR | 0.0439 | 0.0535 | 0.0328 | 0.0773 | 0.0690 | 0.0807 | 0.0543 | 0.1611 | 0.0697 |
| LM    | 0.0635 | 0.0750 | 0.0619 | 0.0930 | 0.0703 | 0.0939 | 0.0728 | 0.1768 | 0.0876 |
| CHA   | 0.0643 | 0.0722 | 0.0658 | 0.0926 | 0.0815 | 0.0943 | 0.0693 | 0.1821 | 0.0913 |
| SIM   | 0.0743 | 0.0866 | 0.0728 | 0.1046 | 0.0745 | 0.1048 | 0.0844 | 0.1861 | 0.0986 |
| CHIA  | 0.0687 | 0.0777 | 0.0568 | 0.0980 | 0.0873 | 0.0989 | 0.0759 | 0.1735 | 0.0928 |
| GEL   | 0.0721 | 0.0814 | 0.0717 | 0.1004 | 0.0819 | 0.1013 | 0.0800 | 0.1858 | 0.0958 |
| MAAN  | 0.0803 | 0.0899 | 0.0942 | 0.1147 | 0.1162 | 0.1162 | 0.0868 | 0.2265 | 0.1179 |
| PIED  | 0.0488 | 0.0583 | 0.0428 | 0.0759 | 0.0557 | 0.0769 | 0.0555 | 0.1569 | 0.0699 |
| PINZ  | 0.0600 | 0.0700 | 0.0562 | 0.0922 | 0.0740 | 0.0915 | 0.0686 | 0.1836 | 0.0841 |
| RMG   | 0.0927 | 0.1034 | 0.0770 | 0.1212 | 0.1051 | 0.1222 | 0.1022 | 0.1873 | 0.1150 |
| SAL   | 0.0759 | 0.0869 | 0.0776 | 0.1050 | 0.0873 | 0.1059 | 0.0841 | 0.1913 | 0.1010 |
| TARE  | 0.0690 | 0.0794 | 0.0678 | 0.1018 | 0.0750 | 0.1018 | 0.0784 | 0.1963 | 0.0941 |
| HO    | 0.0554 | 0.0353 | 0.0788 | 0.0854 | 0.1002 | 0.0922 | 0.0359 | 0.1936 | 0.0908 |
| AYR   | 0.0795 | 0.0816 | 0.0930 | 0.1049 | 0.1115 | 0.1084 | 0.0692 | 0.2084 | 0.1077 |
| JER   | 0.1310 | 0.1392 | 0.1373 | 0.1556 | 0.1471 | 0.1579 | 0.1362 | 0.2469 | 0.1533 |
| BSW   | 0.1034 | 0.1150 | 0.1036 | 0.1333 | 0.0522 | 0.1342 | 0.1084 | 0.2172 | 0.1257 |
| NRC   | 0.0631 | 0.0598 | 0.0765 | 0.0881 | 0.0969 | 0.0929 | 0.0556 | 0.1942 | 0.0915 |
| RET   | 0.1480 | 0.1574 | 0.1498 | 0.1795 | 0.1725 | 0.1813 | 0.1569 | 0.2746 | 0.1761 |
| MOR   | 0.1403 | 0.1497 | 0.1374 | 0.1696 | 0.1616 | 0.1733 | 0.1492 | 0.2597 | 0.1647 |
| PIR   | 0.0494 | 0.0572 | 0.0429 | 0.0788 | 0.0650 | 0.0813 | 0.0570 | 0.1716 | 0.0727 |
| AN    | 0.0900 | 0.0956 | 0.1013 | 0.1151 | 0.1178 | 0.1165 | 0.0923 | 0.2153 | 0.1183 |
| HFD   | 0.1082 | 0.1151 | 0.1156 | 0.1344 | 0.1324 | 0.1368 | 0.1124 | 0.2291 | 0.1338 |
| REDP  | 0.0894 | 0.0956 | 0.1039 | 0.1210 | 0.125  | 0.1228 | 0.0943 | 0.2323 | 0.1212 |
| SCHL  | 0.1129 | 0.1220 | 0.1216 | 0.1400 | 0.1388 | 0.1409 | 0.1177 | 0.2417 | 0.1370 |
| SH    | 0.1099 | 0.1231 | 0.1356 | 0.1445 | 0.1549 | 0.1436 | 0.1169 | 0.2524 | 0.1520 |
| TG    | 0.0706 | 0.0839 | 0.0407 | 0.1012 | 0.0894 | 0.1028 | 0.0818 | 0.1519 | 0.0914 |
| AB    | 0.0809 | 0.0955 | 0.0445 | 0.1118 | 0.1016 | 0.1161 | 0.0935 | 0.1523 | 0.1008 |
| SAR   | 0.0970 | 0.1094 | 0.0611 | 0.1271 | 0.1179 | 0.1301 | 0.1089 | 0.1712 | 0.1171 |
| EAR   | 0.0819 | 0.0959 | 0.0461 | 0.1129 | 0.0999 | 0.1155 | 0.0944 | 0.1529 | 0.1018 |

|      |        |        |        |        |        |        |        |        |        |
|------|--------|--------|--------|--------|--------|--------|--------|--------|--------|
| HANW | 0.0921 | 0.1073 | 0.0580 | 0.1210 | 0.1138 | 0.1248 | 0.1050 | 0.1424 | 0.1113 |
| WAGY | 0.1481 | 0.1631 | 0.1295 | 0.1772 | 0.1728 | 0.1810 | 0.1605 | 0.2105 | 0.1704 |
| MG   | 0.0624 | 0.0759 | 0.0307 | 0.0944 | 0.0797 | 0.0963 | 0.0749 | 0.1362 | 0.0844 |
| QC   | 0.0923 | 0.1075 | 0.0512 | 0.1277 | 0.117  | 0.1287 | 0.1062 | 0.1518 | 0.1147 |
| HN   | 0.2811 | 0.2973 | 0.2550 | 0.3144 | 0.3138 | 0.3187 | 0.2933 | 0.3523 | 0.3076 |
| LX   | 0.1612 | 0.1759 | 0.1198 | 0.1944 | 0.1881 | 0.1982 | 0.1738 | 0.2195 | 0.1838 |
| GUZ  | 0.2603 | 0.2759 | 0.2295 | 0.2950 | 0.2918 | 0.2981 | 0.2722 | 0.3366 | 0.2873 |
| GIR  | 0.3079 | 0.3292 | 0.2920 | 0.3385 | 0.3405 | 0.3438 | 0.3251 | 0.3665 | 0.3359 |
| ONG  | 0.2742 | 0.2930 | 0.2513 | 0.3064 | 0.3058 | 0.3112 | 0.2893 | 0.3389 | 0.3010 |
| HAR  | 0.3335 | 0.3551 | 0.3253 | 0.3637 | 0.3683 | 0.3695 | 0.3511 | 0.4000 | 0.3627 |
| KAN  | 0.3014 | 0.3220 | 0.2840 | 0.3326 | 0.3344 | 0.3376 | 0.3170 | 0.3646 | 0.3293 |
| SAHW | 0.3076 | 0.3299 | 0.2924 | 0.3388 | 0.3410 | 0.3447 | 0.3257 | 0.3674 | 0.3366 |
| THA  | 0.2904 | 0.3110 | 0.2704 | 0.3215 | 0.3221 | 0.3265 | 0.3067 | 0.3510 | 0.3175 |
| BAG  | 0.2834 | 0.3023 | 0.2636 | 0.3145 | 0.3157 | 0.3199 | 0.2987 | 0.3482 | 0.3113 |
| BALI | 0.4690 | 0.5020 | 0.5157 | 0.5000 | 0.5176 | 0.5115 | 0.4971 | 0.5473 | 0.5104 |
| ACE  | 0.3042 | 0.3250 | 0.2877 | 0.3356 | 0.3371 | 0.3411 | 0.3207 | 0.3660 | 0.3326 |
| PES  | 0.2975 | 0.3159 | 0.2780 | 0.3298 | 0.3301 | 0.3349 | 0.3114 | 0.3676 | 0.3259 |
| MAD  | 0.2839 | 0.3022 | 0.2638 | 0.3165 | 0.3162 | 0.3217 | 0.2988 | 0.3541 | 0.3116 |
| BRE  | 0.2823 | 0.3017 | 0.2620 | 0.3145 | 0.3145 | 0.3201 | 0.2977 | 0.3485 | 0.3103 |
| MUGR | 0.0959 | 0.1002 | 0.1073 | 0.1260 | 0.1296 | 0.1283 | 0.0994 | 0.2392 | 0.1267 |
| NDAM | 0.1851 | 0.2044 | 0.1656 | 0.2134 | 0.2067 | 0.2198 | 0.2011 | 0.2598 | 0.2075 |
| BOR  | 0.2145 | 0.2330 | 0.1856 | 0.2448 | 0.2415 | 0.2493 | 0.2288 | 0.2745 | 0.2386 |
| SHK  | 0.1757 | 0.1936 | 0.1406 | 0.2043 | 0.1977 | 0.2086 | 0.1894 | 0.234  | 0.1971 |
| AFR  | 0.1985 | 0.2136 | 0.1738 | 0.2298 | 0.2234 | 0.2338 | 0.2104 | 0.2823 | 0.2222 |
| ZBO  | 0.1892 | 0.2072 | 0.1541 | 0.2186 | 0.2131 | 0.2232 | 0.2032 | 0.2463 | 0.2117 |
| ZFU  | 0.2008 | 0.2196 | 0.1686 | 0.2302 | 0.2259 | 0.2358 | 0.2162 | 0.2584 | 0.2237 |
| ZMA  | 0.2486 | 0.2699 | 0.2269 | 0.279  | 0.2765 | 0.2839 | 0.2646 | 0.3102 | 0.2741 |
| CORR | 0.0719 | 0.0804 | 0.0648 | 0.1002 | 0.0919 | 0.1036 | 0.0796 | 0.1927 | 0.0955 |
| TXLH | 0.0722 | 0.0820 | 0.0638 | 0.0977 | 0.0897 | 0.1014 | 0.0792 | 0.1774 | 0.0943 |
| SENP | 0.0607 | 0.0604 | 0.0628 | 0.0886 | 0.0899 | 0.0913 | 0.0592 | 0.175  | 0.0881 |
| ROMO | 0.0961 | 0.1061 | 0.0915 | 0.1248 | 0.1183 | 0.1256 | 0.1041 | 0.2118 | 0.1218 |
| ANR  | 0.0939 | 0.1005 | 0.1063 | 0.1210 | 0.1233 | 0.1227 | 0.098  | 0.2209 | 0.1235 |
| BR   | 0.2694 | 0.2886 | 0.2466 | 0.2996 | 0.3001 | 0.3046 | 0.2845 | 0.3297 | 0.2958 |
| NEL  | 0.3087 | 0.3303 | 0.2930 | 0.3398 | 0.3418 | 0.3451 | 0.3259 | 0.3679 | 0.3368 |
| BEFM | 0.0892 | 0.1006 | 0.0773 | 0.1186 | 0.1162 | 0.1202 | 0.0966 | 0.1874 | 0.1155 |
| SGT  | 0.0872 | 0.0985 | 0.0802 | 0.1189 | 0.1195 | 0.1188 | 0.0944 | 0.1902 | 0.1182 |
| CANC | 0.0729 | 0.0859 | 0.0550 | 0.1032 | 0.0916 | 0.1048 | 0.0820 | 0.1635 | 0.0978 |

Note: For full definitions of breeds, see [Additional file 1, Table S1](#) and [Additional file 2, Table S2](#).
